# Supplementary material for: miR-155 regulates differentiation of brown and beige adipocytes via a bistable circuit
Source: PubMed Central journal article supplement — Nat Commun. 2013 Apr 23;4:1769–. doi: 10.1038/ncomms2742 (PMC3644088; doi:10.1038/ncomms2742), 2013-04-23
Supplement: ncomms2742-s1.pdf [file ncomms2742-s1.pdf]

## SUPPLEMENTARY INFORMATION

# **miR-155 regulates differentiation of brown and beige adipocytes via a bistable circuit**

Yong Chen<sup>1,2,†</sup>, Franziska Siegel<sup>1,†</sup>, Stefanie Kipschull<sup>1</sup>, Bodo Haas<sup>1,3</sup>, Holger Fröhlich<sup>4</sup>, Gunter Meister<sup>5,6</sup> & Alexander Pfeifer<sup>1,7,\*</sup>

Institute of Pharmacology and Toxicology, University of Bonn, 53127 Bonn, Germany

<sup>2</sup>BIOTECH-PHARMA NRW International Graduate School, 53127 Bonn, Germany

<sup>3</sup>Federal Institute for Drugs and Medical Devices, 53175 Bonn, Germany

<sup>4</sup>Bonn-Aachen International Center for IT (B-IT) Algorithmic Bioinformatics, 53113 Bonn, Germany

<sup>5</sup>Lehrstuhl für Biochemie I, NWF III - Biologie und Vorklinische Medizin, Universität Regensburg, 93053 Regensburg, Germany

<sup>6</sup>Max-Planck-Institute for Biochemistry, 82152 Martinsried, Germany

<sup>7</sup>PharmaCenter, University of Bonn, 53113 Bonn, Germany

\*Correspondence: [alexander.pfeifer@uni-bonn.de](mailto:alexander.pfeifer@uni-bonn.de)

Supplementary Figures S1-8

Supplementary Table S1

---

<sup>†</sup> YC and FS contributed equally to this work

## Supplementary Figure S1

### Validation of identified miRNA candidates, lentiviral over-expression of miRNAs in brown adipocytes.

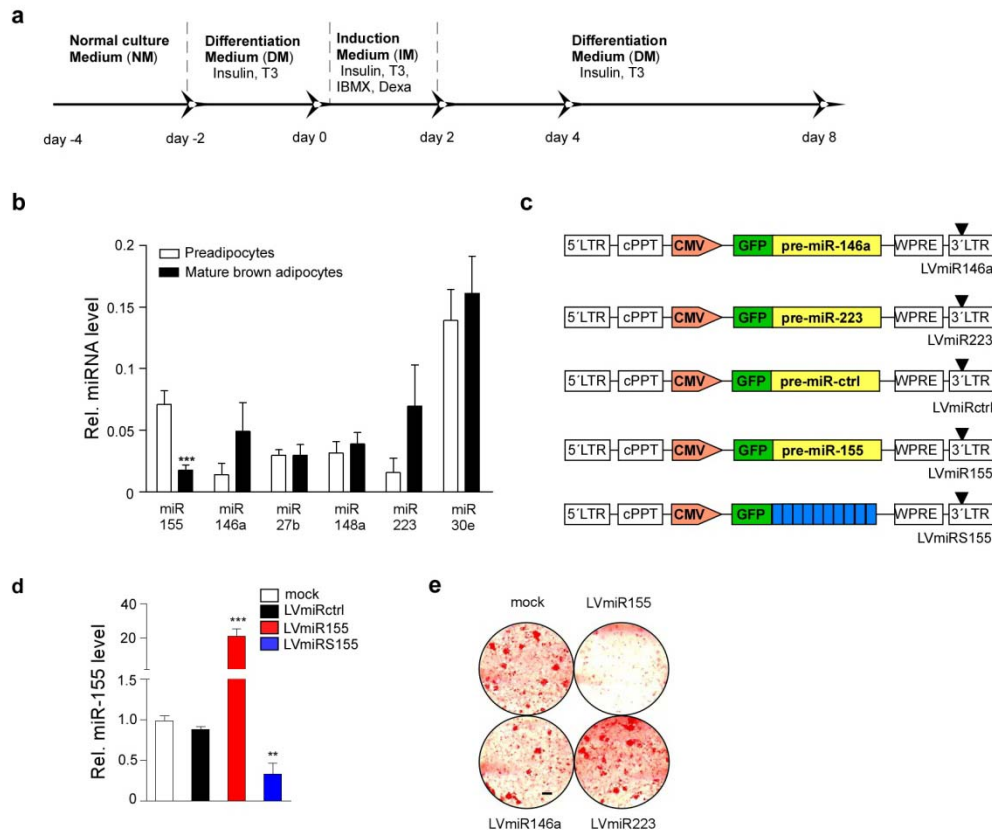

(a) Protocol for *in vitro* differentiation of brown adipocytes (day -4 to day 8). NM, normal growth medium; DM, differentiation medium; IM, induction medium. (b) qRT-PCR analysis of miRNA expression in preadipocytes isolated from brown fat tissue (SVF) versus *in vitro* differentiated mature adipocytes. Data are normalized to sno202RNA expression and are represented as means  $\pm$  SEM. (\*\*\*)  $P < 0.001$  student's *t*-test,  $n=6$ ). (c) Lentiviral expression vectors; LVmiRs express miR-146a, miR-223, or miR-155 precursors (yellow) coupled to GFP mRNA (green), LVmiRctrl contains a scrambled, non-targeting sequence. LVmiRS155 contains a miR-155 'sponge' - an octameric decoy target (blue), complementary to miR155. LTR, long terminal repeat; cPPT, central polypurine tract; CMV, cytomegalovirus promoter; GFP, green fluorescent protein; pre-miR-155, precursor miR-155; WPRE, woodchuck hepatitis responsive element; triangle, self-inactivating mutation. (d) qRT-PCR analysis of miR-155 levels in LVmiR155 and LVmiRS155 transduced preadipocytes (normalized to snoRNA202). Untreated cells (mock) were set as one; data are presented as mean  $\pm$  SEM (\*\*\*)  $P < 0.001$ ; \*\*  $P < 0.01$  one way ANOVA;  $n=3$ ). (e) Oil Red O staining of differentiated brown fat cells transduced with LVmiR155, LVmiR146a and LVmiR223 as compared to uninfected wild-type cells (mock); scale bar = 3mm.

## Supplementary Figure S2

### C/EBP $\beta$ is targeted by miR-155 and is able to rescue the miR-155 phenotype in BAT differentiation.

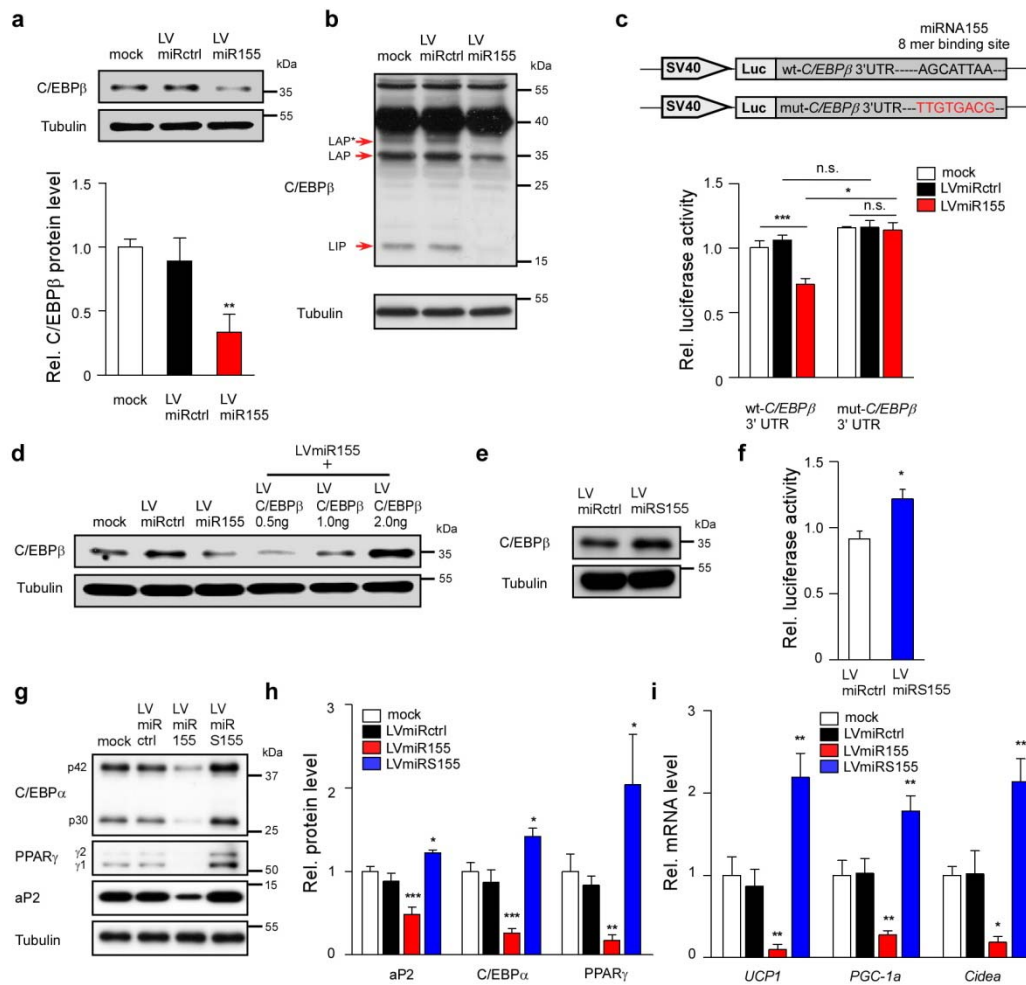

(a) Western Blot analysis (top) of C/EBP $\beta$  expression in cells transduced with LVmiRctrl or LVmiR155; mock, uninfected cells. Quantification of Western blot analyses (bottom), mock was set as one. Data are represented as means  $\pm$  SEM. (\* $P$  < 0.05 one way ANOVA; n=3). (b) Western blot analysis of the three C/EBP $\beta$  isoforms (LAP\*/38kDa, LAP/35kDa, and LIP/20kDa) in mock, LVmiRctrl or LVmiR155 transduced brown adipocytes. (c) Luciferase assay to examine interaction between miR-155 and its predicted target site in the C/EBP $\beta$  3'UTR. Reporter plasmids carrying the wt or "seed" mutated C/EBP $\beta$  3'UTR (top) were transfected into HIB-1B cells transduced with LVmiRctrl or LVmiR155. Data are presented as means  $\pm$  SEM. (\* $P$  < 0.05; \*\*\* $P$  < 0.001 one way ANOVA; n.s., not significant, n=3). (d) Western blot analysis of C/EBP $\beta$  expression in the LVmiR155 cells transduced with increasing amounts of LVC/EBP $\beta$  to rescue the effect of miR-155. (e) Western blot analysis of C/EBP $\beta$  protein levels in LVmiRctrl or LVmiRS155 transduced preadipocytes. (f) Luciferase assay to analyse miR-155 interaction with the C/EBP $\beta$  3'UTR. Reporter plasmids containing the C/EBP $\beta$  3'UTR were transfected into LVmiRctrl or LVmiRS155 transduced HIB-1B cells. LVmiRctrl transduced controls were set as one. Data are presented as means  $\pm$  SEM. (\* $P$  < 0.05 student's  $t$ -test; n=3). (g) Representative Western blot of C/EBP $\beta$ , PPAR $\gamma$ , and aP2 in differentiated brown adipocytes transduced with LVmiRctrl, LVmiR155, and LVmiRS155, respectively; mock, uninfected control. (h) Quantification of Western blot analyses of fat cell markers. Uninfected controls (mock) were set as one. Data were normalized to Tubulin and are represented as means  $\pm$  SEM. (\* $P$  < 0.05; \*\* $P$  < 0.01; \*\*\* $P$  < 0.001 one way ANOVA; n=4). (i) qRT-PCR analyses of brown fat cell markers *PGC-1 $\alpha$* , *UCP1*, and *Cidea* in differentiated brown adipocytes transduced with the indicated lentiviral vectors. Untreated cells (mock) were set as one. Data were normalized to HPRT expression and are represented as means  $\pm$  SEM. (\* $P$  < 0.05; \*\* $P$  < 0.01 one way ANOVA; n=4). Tubulin served as loading control to all western blot analysis.

## Supplementary Figure S3

TGF $\beta$  regulates miR-155 expression via the TGF $\beta$ /Smad4 pathway in brown adipocytes.

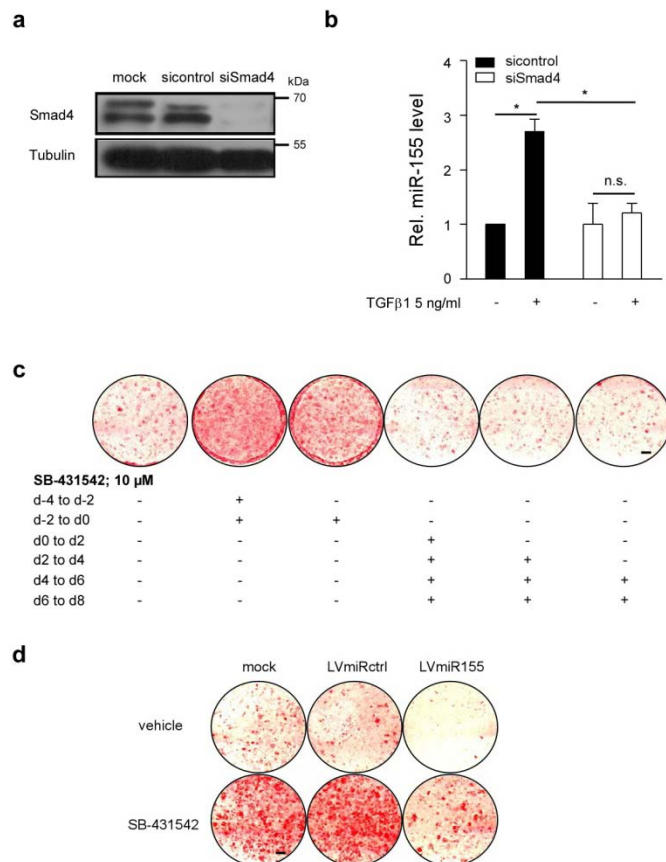

(a) Western blot analysis of Smad4 protein levels in untransduced (mock), control siRNA (RVsicontrol) and Smad4 siRNA (RVsiSmad4) transduced preadipocytes. (b) qRT-PCR analysis of miR-155 expression in RVsicontrol or RVsiSmad4 transduced preadipocytes with or without TGF $\beta$ 1 treatment (5 ng/ml; 24 h). Untreated, RVsicontrol transduced cells served as control. Data are presented as means  $\pm$  SEM. (\* $P$  < 0.05 student's  $t$ -test; n.s., not significant; n=3). (c) Oil Red O staining (day 8) of brown fat cells treated with 10 $\mu$ M SB-431542 (TGF $\beta$ 1 receptor inhibitor) at indicated time points during *in vitro* differentiation, scale bar = 3mm. (d) Oil Red O staining of fully differentiated brown adipocytes infected with LVmiRctrl or LVmiR155 and treated with vehicle or SB-431542 (10 $\mu$ M, day -2 to day 0); mock, uninfected cells; vehicle, distilled water, scale bar = 3mm.

## Supplementary Figure S4

### C/EBP $\beta$ and miR-155 constitute a negative feedback loop in brown adipocytes.

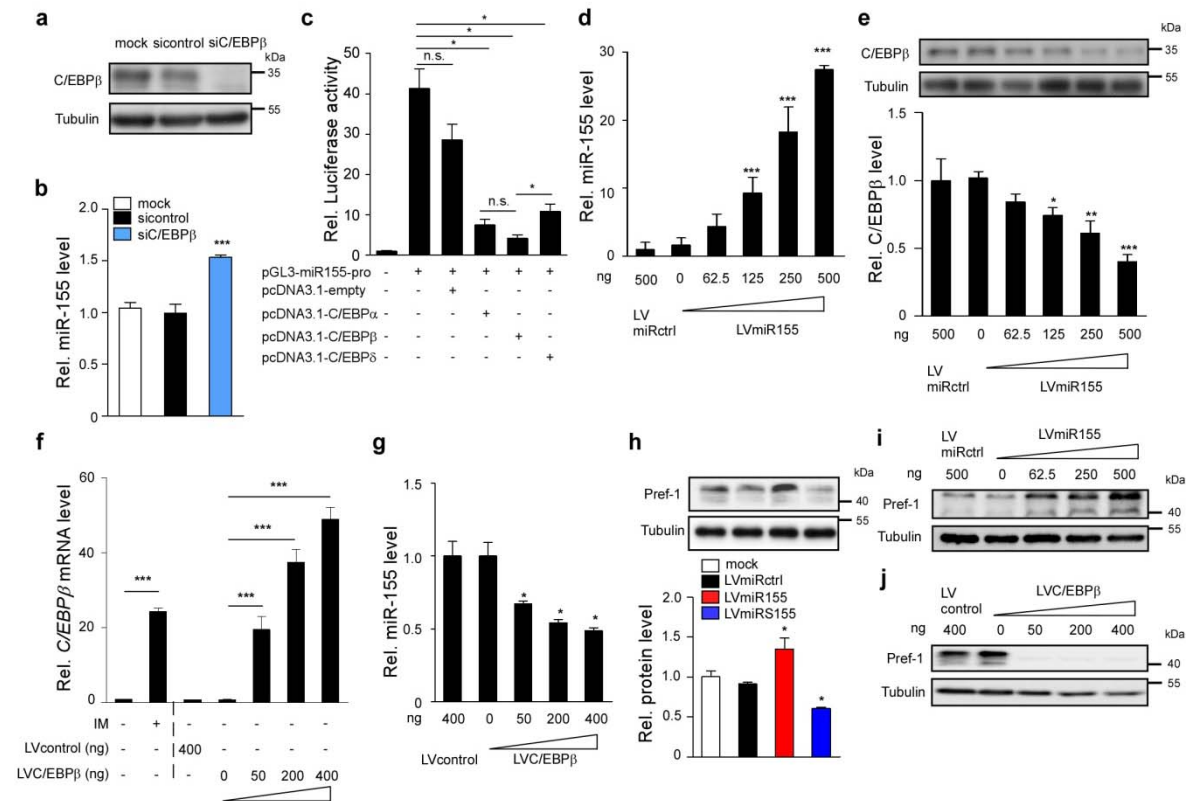

(a) Western blot analysis of C/EBP $\beta$  expression in preadipocytes 48h post transduction with sicontrol (control-siRNA) or siC/EBP $\beta$  (C/EBP $\beta$ -siRNA). (b) qRT-PCR analysis of miR-155 levels in preadipocytes 48h after transduction with sicontrol or siC/EBP $\beta$ . miR-155 levels were normalized to snoRNA202; untransduced cells were set as one. Data are presented as means  $\pm$  SEM (\*\*\* $P$  < 0.001 one way ANOVA;  $n$ =3). (c) Luciferase reporter assay to analyze regulation of the *BIC/miR-155* promoter by C/EBPs. HIB-1B cells were co-transfected with C/EBP $\alpha$ , C/EBP $\beta$ , or C/EBP $\delta$  expression vectors and the *BIC/miR-155* promoter luciferase construct. Untransfected cells were set as one; data are represented as means  $\pm$  SEM (\* $P$  < 0.05 one way ANOVA; n.s., not significant;  $n$ =3). (d) qRT-PCR analysis of miR-155 expression levels in preadipocytes transduced with LVmiRctrl or different amounts of LVmiR155. Data are normalized to sno202 expression, untreated cells were set as one; data are presented as means  $\pm$  SEM (\*\*\* $P$  < 0.001 one way ANOVA;  $n$ =3). (e) Western-blot analysis of C/EBP $\beta$  protein levels in preadipocytes 48h post transduction with LVmiRctrl or LVmiR155 (top). Quantification of C/EBP $\beta$  protein levels (bottom). Data were normalized to Tubulin; untreated cells were set as one; data are presented as means  $\pm$  SEM (\* $P$  < 0.05; \*\* $P$  < 0.01; \*\*\* $P$  < 0.001 one way ANOVA;  $n$ =3). (f) qRT-PCR analysis of C/EBP $\beta$  mRNA levels in preadipocytes transduced with LVcontrol or LVC/EBP $\beta$  as indicated, or stimulated with induction medium (IM) for 8 hours. Expression was normalized to HPRT; untransduced cells were set as one; data are presented as means  $\pm$  SEM (\*\*\* $P$  < 0.001 one way ANOVA;  $n$ =3). (g) qRT-PCR analysis of miR-155 expression levels in preadipocytes transduced with LVcontrol or LVC/EBP $\beta$ . miR-155 levels were normalized to snoRNA202; untransduced cells were set as one. Data are presented as means  $\pm$  SEM (\* $P$  < 0.05 one way ANOVA;  $n$ =3). (h) Western-blot analysis of Pref-1 protein levels in differentiated brown adipocytes transduced with LVmiRctrl, LVmiR155 or LVsmiR155. One representative blot is shown (top). Quantification of Pref-1 protein levels (bottom). Data were normalized to Tubulin; untreated cells (mock) were set as one; data are presented as means  $\pm$  SEM (\* $P$  < 0.05 one way ANOVA;  $n$ =3). (i, j) Western-blot analysis of Pref-1 expression in preadipocytes transduced with (i) LVmiRctrl and LVmiR-155 or (j) LVcontrol and LVC/EBP $\beta$  at different dosages. Tubulin served as loading control.

**Supplementary Figure S5**  
**miR-155 regulates brown fat differentiation *in vivo*.**

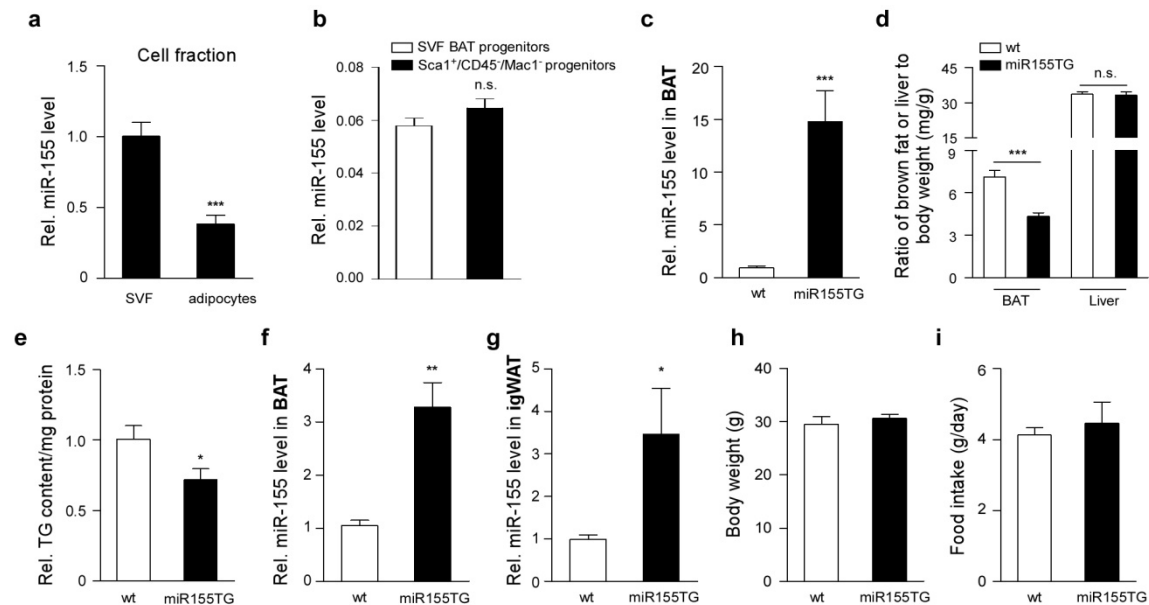

(a) qRT-PCR analysis of miR-155 expression in cells of the SVF and the mature adipocyte fraction isolated from BAT of new-born mice. SVF data were set as one; data are represented as means  $\pm$  SEM (\*\* $P < 0.001$  student's  $t$ -test;  $n=3$ ). (b) qRT-PCR analysis comparing miR-155 expression levels in the total SVF versus the sub-fraction of FACS-sorted Sca-1<sup>+</sup>, CD-45<sup>-</sup> and Mac-1<sup>-</sup> SVF-derived cells. Data are normalized to sno202RNA, and represented as means  $\pm$  SEM (n.s., not significant student's  $t$ -test;  $n=3$ ). (c) qRT-PCR analysis of miR-155 levels in interscapular BAT from one week old wt or miR-155 transgenic (miR155TG) mice. miR-155 levels were normalized to snoRNA202. Data of wt were set as one; data are represented as means  $\pm$  SEM (\*\* $P < 0.001$  student's  $t$ -test,  $n=3$ ). (d) Ratios of interscapular BAT and liver weight to total body weight of 1 week old wt and miR155TG mice. Data are presented as means  $\pm$  SEM (\*\* $P < 0.001$ ; ns: not significant student's  $t$ -test; wt group  $n=6$ , miR155TG group  $n=6$ ). (e) TG content of interscapular BAT isolated from 1 week old wt or miR155TG mice. TG content was normalized to total protein concentration of lysates. wt was set as one, and data are represented as means  $\pm$  SEM (\* $P < 0.05$ ; \*\* $P < 0.01$  student's  $t$ -test;  $n=3$ ). (f,g) qRT-PCR analysis of miR-155 expression levels in (f) interscapular BAT, or in (g) igWAT from ten week old wt or miR155TG mice. miR-155 levels were normalized to snoRNA202. wt was set as one; data are represented as means  $\pm$  SEM (\* $P < 0.05$ ; \*\* $P < 0.01$  student's  $t$ -test;  $n=3$ ). (h) Body weight and (i) daily food intake of wt and miR-155TG littermates at 10-13 weeks of age (wt group  $n=5$ , miR155TG group  $n=9$ ). Data are represented as means  $\pm$  SEM.

## Supplementary Figure S6

### miR-155 impairs brown adipogenesis in an *in vivo* model with BAT specific miR-155 overexpression.

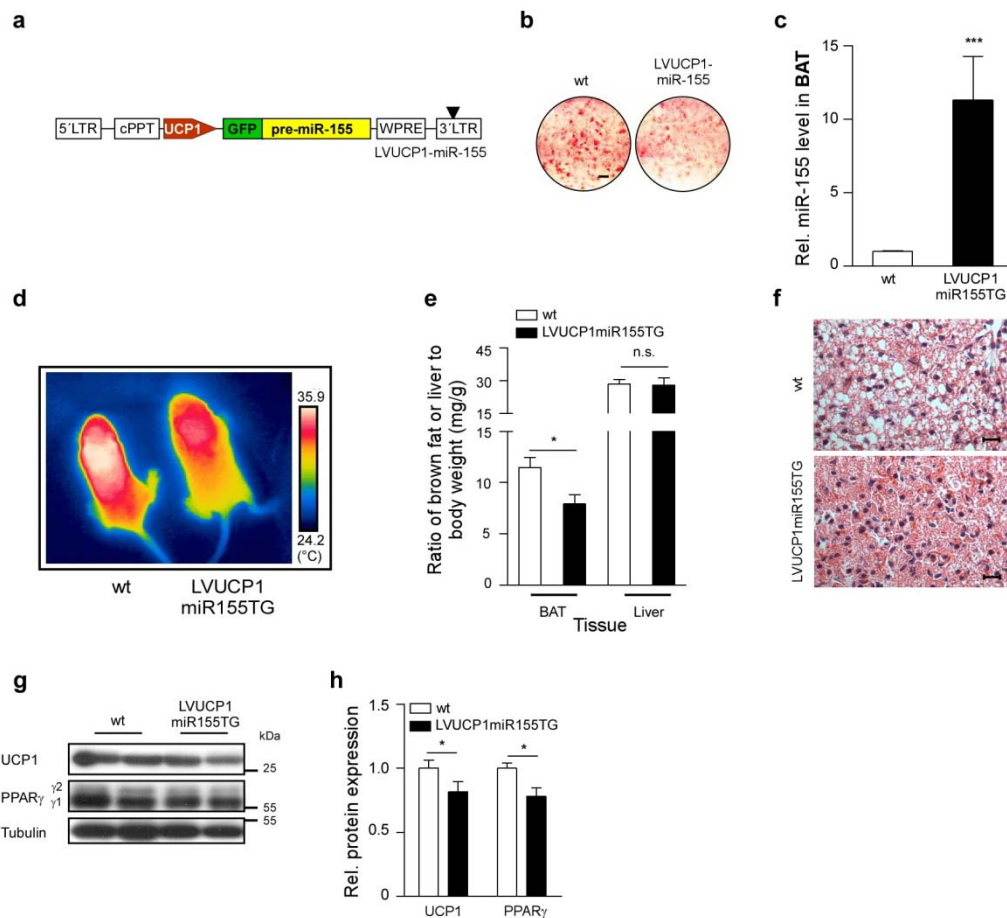

(a) Schematic representation of the lentiviral construct (LVUCP1-miR-155) for brown fat-specific expression of miR-155. LTR, long terminal repeat; cPPT, central polypurine tract; UCP1, uncoupling protein 1 promoter; GFP, green fluorescent protein; pre-miR-155, precursor miR-155; WPRE, woodchuck hepatitis responsive element; triangle, self-inactivating mutation. (b) Oil Red O staining of differentiated brown adipocytes transduced with LVUCP1-miR-155 as compared to wt cells, scale bar = 3mm. (c) qRT-PCR analysis of miR-155 expression levels in 1 week old wt and miR-155 transgenic (LVUCP1miR155TG) mice generated by transduction of preimplantation embryos with LVUCP1-miR-155. miR-155 levels were normalized to snoRNA202. Data are represented as means  $\pm$  SEM. (\*\*\*)  $P < 0.001$  student's *t*-test; wt group  $n=7$ , LVUCP1miR155TG group  $n=7$ ). (d) Body surface temperature of wt and LVUCP1miR155TG mice was measured by infrared thermography. (e) Ratios of BAT and liver weight versus total body weight. Data are represented as means  $\pm$  SEM. (\* $P < 0.05$  student's *t*-test; n.s., not significant; wt group  $n=7$ , LVUCP1miR155TG group  $n=7$ ). (f) Hematoxylin and eosin staining of BAT sections from one week old wt and LVUCP1miR155TG littermates; (scale bar = 15  $\mu$ m). (g) Western Blot analysis of UCP1 and PPAR<sub>γ</sub> protein levels in BAT isolated from wt and LVUCP1miR155TG littermates. Tubulin served as loading control. 2 representative pairs are shown. (h) Densitometric quantification of Western blot analyses (right). Proteins expression was normalized to Tubulin. Data are presented as means  $\pm$  SEM. (\* $P < 0.05$  student's *t*-test; wt group  $n=7$ , LVUCP1miR155TG group  $n=7$ ).



## Supplementary Figure S7

### miR-155 regulates white fat differentiation and browning of WAT *in vitro*.

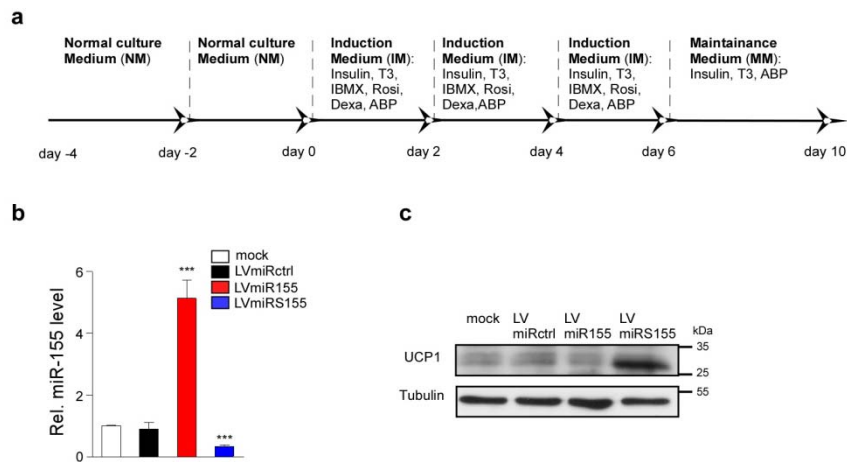

(a) Differentiation protocol used for *in vitro* differentiation of white preadipocytes (day -4 to day 10). NM, normal growth medium; MM, maintenance medium; IM, induction medium. (b) qRT-PCR analysis of miR-155 expression levels in LVmiRctrl, LVmiR155 or LVmiRS155 transduced white preadipocytes (normalized to snoRNA202). Untransduced cells (mock) were set as one. Data are represented as means  $\pm$  SEM (\*\*\*)  $P < 0.001$  one way ANOVA;  $n=3$ ). (c) Western Blot analysis of UCP1 protein levels in LVmiRctrl, LVmiR155 or LVmiRS155 transduced fully differentiated white adipocytes at day 9. Tubulin served as loading control.



## Supplementary Figure S8

### Thermogenesis and respiration are increased in miR-155<sup>+/-</sup> mice.

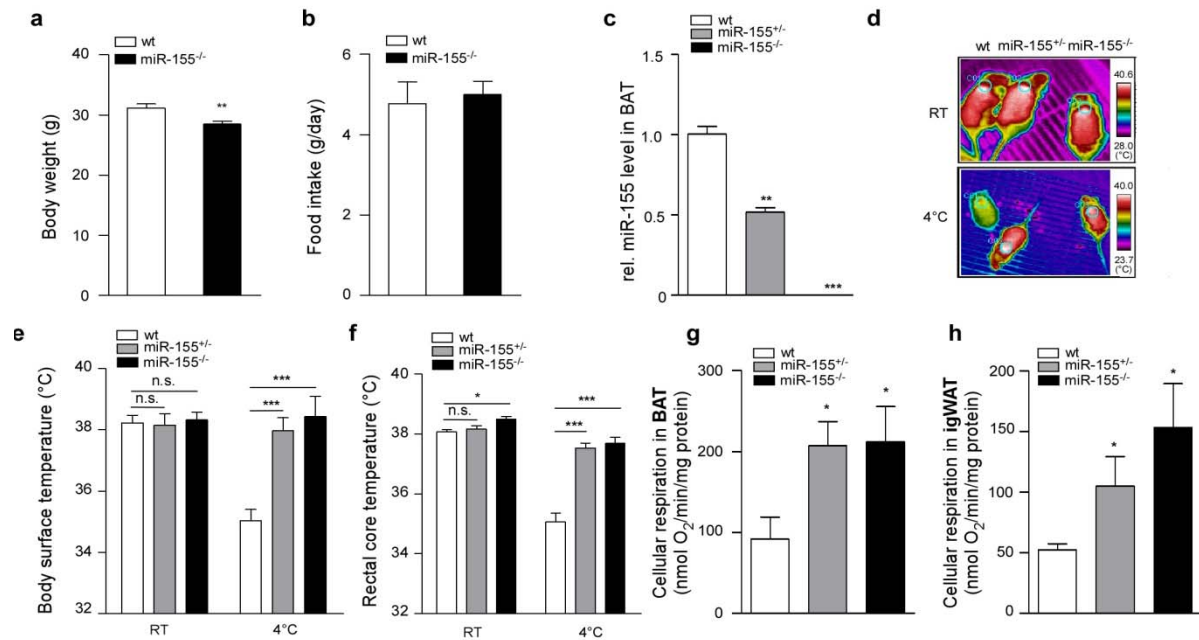

(a) Body weight and (b) daily food intake of wt and miR-155<sup>-/-</sup> littermates at 12-16 weeks of age; Data are represented as means  $\pm$  SEM (\*\* $P$  < 0.01 student's  $t$ -test; wt group  $n=12$ , miR-155<sup>-/-</sup> group  $n=16$ ). (c) RT-PCR analysis of miR-155 expression levels in interscapular brown adipose tissue (BAT) from sixteen week old mice. Data are normalized to sno202RNA expression; data of wt group were set as one data are represented as means  $\pm$  SEM (\*\* $P$  < 0.01; \*\*\* $P$  < 0.001 one way ANOVA; wt group  $n=3$ , miR-155<sup>+/-</sup> group  $n=3$ , and miR-155<sup>-/-</sup> group  $n=3$ ). (d) Infrared thermography analysis of body surface temperature of 12-16 weeks old wt, miR-155<sup>+/-</sup> or miR-155<sup>-/-</sup> littermates exposed to 4°C. (e) Statistical analysis of body surface temperature. Data are represented as means  $\pm$  SEM (\* $P$  < 0.05 one way ANOVA; n.s., not significant) (wt group  $n=7$ , miR-155<sup>+/-</sup> group  $n=5$ , and miR-155<sup>-/-</sup> group  $n=5$ ). (f) Statistical analysis of rectal body core temperature measurement of 12-16 weeks old wt, miR-155<sup>+/-</sup> or miR-155<sup>-/-</sup> littermates exposed to either RT or 4°C. Data are represented as means  $\pm$  SEM (\* $P$  < 0.05; \*\*\* $P$  < 0.001 one way ANOVA; n.s., not significant) (wt group  $n=14$ , miR-155<sup>+/-</sup> group  $n=14$ , and miR-155<sup>-/-</sup> group  $n=12$ ). (g,h) *Ex vivo* Oxygraph measurement of cellular mitochondrial respiration in (g) interscapular BAT (BAT), or in (h) igWAT of wt, miR-155<sup>+/-</sup> and miR-155<sup>-/-</sup> littermates at 12-16 weeks of age. Data are represented as means  $\pm$  SEM (\* $P$  < 0.05; one way ANOVA; n.s., not significant; wt group  $n=6$ , miR-155<sup>+/-</sup> group  $n=6$ , and miR-155<sup>-/-</sup> group  $n=5$ ).

## Supplementary Table S1

Supplementary Table S1: qRT-PCR primer sequences

| Primer name/ cDNA            | Primer sequence                                |
|------------------------------|------------------------------------------------|
| UCP1 forward                 | 5' - GGT GAA CCC GAC AAC TTC CGA AGT G - 3'    |
| UCP1 reverse                 | 5' - GGG TCG TCC CTT TCC AAA GTG TTG A - 3'    |
| PGC-1 $\alpha$ forward       | 5' - GCA CAC ACC GCA ATT CTC CCT TGT A - 3'    |
| PGC-1 $\alpha$ reverse       | 5' - ACG CTG TCC CAT GAG GTA TTG ACC A - 3'    |
| Cidea forward                | 5' - ATT TAA GAG ACG CGG CTT TGG GAC A - 3'    |
| Cidea reverse                | 5' - TTT GGT TGC TTG CAG ACT GGG ACA T - 3'    |
| HPRT forward                 | 5' - ACA TTG TGG CCC TCT GTG TGC TCA - 3'      |
| HPRT reverse                 | 5' - CTG GCA ACA TCA ACA GGA CTC CTC GT - 3'   |
| C/EBP $\alpha$ forward       | 5' - CGA GGA GGA CGA GGC GAA GCA - 3'          |
| C/EBP $\alpha$ reverse       | 5' - TGC GCA GGC GGT CAT TGT CAC - 3'          |
| C/EBP $\beta$ forward        | 5' - CAC CAC GAC TTC CTC TCC GAC CTC T - 3'    |
| C/EBP $\beta$ reverse        | 5' - GTA CTC GTC GCT CAG CTT GTC CAC C - 3'    |
| aP2 forward                  | 5' - TGA AAG AAG TGG GAG TGG GCT TTG C - 3'    |
| aP2 reverse                  | 5' - CAC CAC CAG CTT GTC ACC ATC TCG T - 3'    |
| PPAR $\gamma$ 2 forward      | 5' - TCC GTA GAA GCC GTG CAA GAG ATC A - 3'    |
| PPAR $\gamma$ 2 reverse      | 5' - CAG CAG GTT GTC TTG GAT GTC CTC G - 3'    |
| ChIP C/EBP $\beta$ A fwd     | 5' – TGT GTG GTA GGA AGA AAA CCT TCA - 3'      |
| ChIP C/EBP $\beta$ A rev     | 5' – TGT CAG ATT CGT GGA CAC AGA AA - 3'       |
| ChIP C/EBP $\beta$ B/C/D fwd | 5' – CCA GAT ACT ACA GGG ATC TAA AGA GGT T -3' |
| ChIP C/EBP $\beta$ B/C/D rev | 5' – TCA GGC CTT CCC CTA AAA CTC - 3'          |
| ChIP C/EBP $\beta$ E fwd     | 5' – CAG AGT GAC CTG CCT TAT CTT AAA AA - 3'   |
| ChIP C/EBP $\beta$ E rev     | 5' – GAC CCT TTA ATA CAG TTC CTT CTG TTG - 3'  |
